# Supplementary material for: Barley Anther and Meiocyte Transcriptome Dynamics in Meiotic Prophase I
Source: Front Plant Sci. 2021 Jan 12;11:619404. doi: 10.3389/fpls.2020.619404 (PMC7835676; doi:10.3389/fpls.2020.619404)
Supplement: Supplementary Table 7 — Expression of sRNA gene silencing orthologs. [file Table_7.xlsx]

## Sheet: Table S7
BAnTr	Mikado	Morex.V2	Morex.V1	BaRT	Name	ExpressionFilter	WGCNA	coding.noncoding	PANNZER	Mercator.Bin	Mercator.Bin.Name	Mercator.annotation	COG	eggNOG	A.Pre.1	A.Pre.2	A.Pre.3	A.LepZyg.1	A.LepZyg.2	A.LepZyg.3	A.PacDip.1	A.PacDip.2	A.PacDip.3	A.MetTet.1	A.MetTet.2	A.MetTet.3	M.LepZyg.1	M.LepZyg.2	M.LepZyg.3	M.PacDip.1	M.PacDip.2	M.PacDip.3	GEMB.A	GEMB.B	GEMB.C	GEMB.D	A.LEP.vs.A.PRE.Pval	A.LEP.vs.A.PRE.log2FC	A.PAC.vs.A.LEP.Pval	A.PAC.vs.A.LEP.log2FC	A.TET.vs.A.PAC.Pval	A.TET.vs.A.PAC.log2FC	M.LEP.vs.A.LEP.Pval	M.LEP.vs.A.LEP.log2FC	M.PAC.vs.A.PAC.Pval	M.PAC.vs.A.PAC.log2FC	M.PAC.vs.M.LEP.Pval	M.PAC.vs.M.LEP.log2FC	NAME
BAnTr.GP.1HG005728	mikado.chr1_part2G216	HORVU.MOREX.r2.1HG0033960	HORVU1Hr1G041820	BART1_0-u02780	HvDRB2a	AntherDataset	Yellow	coding	Double-stranded RNA-binding protein 6	35.1	not assigned.annotated	Double-stranded RNA-binding protein 6 OS=Oryza sativa subsp. japonica (sp|q9av50|drb6_orysj : 258.0)	J	Double-stranded RNA binding motif	1.70749	3.16104	2.65676	1.9441	2.10547	2.19425	1.8965	1.00402	1.59243	1.40581	1.35624	1.85821	2.56306	1.82252	2.39255	2.69606	1.46945	0.452731	0.340747	0.186514	1.06351	0.830272	0.99604	0.00351594	0.814816	-0.186959	0.992823	-0.014422	0.499564	0.356994	0.812453	-0.224761	0.228063	-0.768713	NA
BAnTr.GP.1HG005730	#N/A	#N/A	#N/A	#N/A	HvDRB2b	BothDatasets	Red	coding	Double-stranded RNA-binding domain	35.1	not assigned.annotated	Double-stranded RNA-binding protein 6 OS=Oryza sativa subsp. japonica (sp|q9av50|drb6_orysj : 476.0)	J	Double-stranded RNA binding motif	11.8164	12.6709	11.7246	9.46849	6.3561	10.0628	7.15988	5.99522	6.38077	6.82352	5.86234	8.37062	3.74165	3.83067	5.27908	3.01473	4.30453	4.04285	6.31236	6.56071	6.61815	7.18472	0.103874	-0.315881	0.777911	-0.0715571	0.885873	0.0832287	0.00284026	-0.707232	0.00678924	-0.742312	0.694376	-0.106637	NA
BAnTr.GP.1HG005852	mikado.chr1_part2G324	HORVU.MOREX.r2.1HG0034750	HORVU1Hr1G042710	BART1_0-u02838	HvDCL5	BothDatasets	Olive	coding	Endoribonuclease Dicera	12.5.1.8	Chromatin organisation.DNA methylation.RNA-directed DNA methylation (RdDM) pathway.endoribonuclease (DCL3)	endoribonuclease (DCL3) (original description: none)	A	Belongs to the helicase family. Dicer subfamily	14.7648	19.8576	17.189	126.099	97.5768	71.1384	79.4861	23.5008	20.8419	9.67114	10.4119	17.0244	104.905	201.509	202.263	81.6668	20.5092	81.6533	0.395964	0.633325	0.477178	0.771812	0.00149479	2.68857	0.112877	-1.19589	0.25849	-1.52226	0.111567	1.03566	0.449492	0.650851	0.0659573	-1.5807	NA
BAnTr.GP.1HG014546	mikado.chr1_part2G6880	HORVU.MOREX.r2.1HG0078650	HORVU1Hr1G095300	BART1_0-u06725	HvAGO4b	BothDatasets	Navy	coding	Argonaute	12.5.1.13	Chromatin organisation.DNA methylation.RNA-directed DNA methylation (RdDM) pathway.siRNA-integrating factor (AGO)	siRNA-integrating factor (AGO) (original description: none)	J	Belongs to the argonaute family	54.879	47.5445	49.5899	30.1749	27.5425	28.2471	45.0974	35.4662	31.9574	31.4039	32.5266	32.2113	41.5531	37.7511	28.2975	35.7177	46.7883	45.2706	26.2721	30.09	29.2292	31.1258	0.00719087	-0.608972	0.00956504	0.661118	0.636468	-0.204849	0.00959155	0.575386	0.312643	0.248895	0.156233	0.334626	HvAGO4b
BAnTr.GP.2HG004782	mikado.chr2_part1G3270	#N/A	HORVU2Hr1G031130	BART1_0-u09343	HvAGO5b	AntherDataset	Navy	coding	#N/A	35.1	not assigned.annotated	Protein argonaute MEL1 OS=Oryza sativa subsp. japonica (sp|q851r2|mel1_orysj : 1182.0)	J	Belongs to the argonaute family	1.74026	0.97864	1.10044	45.6905	74.6074	32.3007	113.727	98.9485	99.3855	68.8318	107.006	53.4535	204.2	161.785	142.254	255.906	370.463	250.782	0.176506	0.17264	0.064446	0.163966	4.81e-06	5.50313	0.00714387	1.39354	0.545692	-0.489489	0.000180473	2.06809	0.00284025	1.53237	0.0790772	0.857824	HvAGO5b
BAnTr.GP.2HG011942	mikado.chr2_part2G2026	HORVU.MOREX.r2.2HG0143830	HORVU2Hr1G081260	BART1_0-u12867	HvRDR2	BothDatasets	Yellow	coding	RNA-dependent RNA polymerase	12.5.1.9	Chromatin organisation.DNA methylation.RNA-directed DNA methylation (RdDM) pathway.ssRNA polymerase (RDR2)	ssRNA polymerase (RDR2) (original description: none)	A	Probably involved in the RNA silencing pathway and required for the generation of small interfering RNAs (siRNAs)	18.9459	21.8229	20.9821	13.2514	10.536	13.6296	11.1349	6.70515	6.99529	6.69594	5.35156	7.75781	9.92647	14.6685	15.3098	9.97418	7.93644	8.80422	3.02293	2.87325	3.17141	3.13252	0.0242462	-0.520852	0.232483	-0.308493	0.512606	-0.331375	0.107413	0.348664	0.563585	0.175276	0.0803775	-0.481881	NA
BAnTr.GP.2HG013010	mikado.chr2_part2G2738	#N/A	HORVU2Hr1G088270	BART1_0-u13406	HvDCL4	BothDatasets	Navy	coding	Ribonuclease III domain	16.10.1.3	RNA processing.mRNA silencing.transacting siRNA pathway.endoribonuclease (DCL4)	endoribonuclease (DCL4) (original description: none)	A	Belongs to the helicase family. Dicer subfamily	8.74369	9.92781	13.6686	6.18167	4.93644	6.43342	5.33075	5.75033	5.89677	5.0685	5.51823	6.27904	7.45321	5.77721	8.39577	7.34391	9.54849	9.53664	11.6765	13.4627	14.0907	12.7669	0.0104965	-0.669043	0.398056	0.242362	0.996936	-0.00230963	0.0216088	0.575111	0.0191751	0.700155	0.164734	0.367406	NA
BAnTr.GP.2HG014304	mikado.chr2_part2G3702	HORVU.MOREX.r2.2HG0155450	HORVU2Hr1G095580	BART1_0-u14081	HvAGO1b	BothDatasets	Red	coding	Argonaute	16.10.3	RNA processing.mRNA silencing.RIS-Complex miRNA recruiting factor (AGO1)	RIS-Complex miRNA recruiting factor (AGO1) (original description: none)	J	Belongs to the argonaute family	99.1035	84.4758	82.8424	47.7263	32.6052	49.7574	34.4863	26.2185	26.8196	33.6266	27.829	34.2808	18.1532	20.2374	26.4242	17.016	14.0719	15.0006	28.1683	29.3229	30.451	30.7978	0.000396861	-0.845695	0.186513	-0.26694	0.736212	0.13965	0.00116817	-0.723922	0.000963587	-0.858662	0.0825423	-0.40168	HvAGO1b
BAnTr.GP.2HG014700	mikado.chr2_part2G3978	HORVU.MOREX.r2.2HG0157160	HORVU0Hr1G005350	BART1_0-u57831	HvAGO7	BothDatasets	Red	coding	Argonaute/Dicer protein, PAZ	35.1	not assigned.annotated	Protein argonaute 7 OS=Oryza sativa subsp. japonica (sp|q75hc2|ago7_orysj : 1537.0)	J	Belongs to the argonaute family	3.52906	4.19856	3.70098	1.72028	1.04796	2.15001	1.04748	0.558231	0.758895	0.663303	0.752476	1.16433	0.451686	0.609215	1.19713	0.520441	0.270953	0.259708	0.45279	0.512869	0.669926	0.379695	0.00554457	-1.0972	0.221424	-0.642881	0.988436	0.0168588	0.0416513	-0.85748	0.0695027	-1.20149	0.111174	-0.986889	HvAGO7
BAnTr.GP.2HG014830	#N/A	HORVU.MOREX.r2.2HG0157770	HORVU2Hr1G098610	BART1_0-u14311	HvAGO3b	BothDatasets	Navy	coding	Eukaryotic translation initiation factor 2c, putative	35.1	not assigned.annotated	Protein argonaute 2 OS=Oryza sativa subsp. japonica (sp|q7xts4|ago2_orysj : 756.0)	J	DUF1785	0.784257	1.01089	0.95518	6.74684	9.15309	4.32118	12.0799	7.34695	6.82189	4.77581	5.67005	3.91722	28.97	27.112	22.0047	29.707	37.4579	30.6398	0.98661	0.805697	0.846062	0.812666	4.43e-05	3.03827	0.0794089	0.683947	0.235366	-0.828419	3.09e-05	2.25923	0.000165538	1.98058	0.261402	0.405292	HvAGO3b
BAnTr.GP.2HG014836	mikado.chr2_part2G4110	HORVU.MOREX.r2.2HG0157790	HORVU2Hr1G098620	BART1_0-u14308	HvAGO3a	AntherDataset	Navy	coding	Eukaryotic translation initiation factor 2c, putative	35.1	not assigned.annotated	Protein argonaute 2 OS=Oryza sativa subsp. japonica (sp|q7xts4|ago2_orysj : 736.0)	J	Belongs to the argonaute family	1.62015	2.63422	2.18715	10.9081	16.3976	7.0048	23.0061	13.0629	11.9763	10.5088	15.8542	9.03416	55.2318	46.4446	35.9365	57.768	77.2943	71.0869	0.100958	0.09976	0.126843	0.115046	0.000275875	2.57435	0.0988076	0.793243	0.666106	-0.407287	0.000113908	2.32447	0.000375761	2.20397	0.151578	0.67275	HvAGO3a
BAnTr.GP.2HG014844	#N/A	HORVU.MOREX.r2.2HG0157800	HORVU2Hr1G098650	BART1_0-u14316	HvAGO2	BothDatasets	Green	coding	Argonaute 2	12.5.1.15.2	Chromatin organisation.DNA methylation.RNA-directed DNA methylation (RdDM) pathway.non-canonical RdDM pathway.siRNA-binding factor (AGO2)	siRNA-binding factor (AGO2) of non-canonical RdDM pathway (original description: none)	J	Belongs to the argonaute family	8.9691	6.39035	6.50355	8.98627	7.17714	4.87446	12.5727	8.02668	7.2553	8.9873	11.2482	7.3979	13.2674	12.4222	12.4351	11.7734	12.298	13.0165	7.65785	7.85356	9.24638	8.9088	0.716158	0.11777	0.0329846	0.722749	0.977655	0.0180967	0.000874761	1.18609	0.139416	0.5001	0.935665	0.0367626	HvAGO2
BAnTr.GP.3HG003716	mikado.chr3_part1G2852	HORVU.MOREX.r2.3HG0197830	HORVU3Hr1G021290	BART1_0-u18684	HvAGO18	AntherDataset	Green	coding	#N/A	35.1	not assigned.annotated	Protein argonaute 18 OS=Oryza sativa subsp. japonica (sp|q69up6|ago18_orysj : 984.0)	J	Belongs to the argonaute family	5.56898	2.15351	1.91689	47.0797	60.2276	28.7344	106.555	102.663	95.625	67.877	93.4199	53.8358	168.228	156.477	142.288	206.025	315.302	199.414	0.050174	0.091428	0.106813	0.053362	1.08e-05	4.17095	0.00475883	1.50871	0.508462	-0.525669	0.000152626	2.10729	0.00843579	1.2736	0.138314	0.675019	HvAGO18
BAnTr.GP.3HG004604	mikado.chr3_part1G3416	HORVU.MOREX.r2.3HG0202860	HORVU3Hr1G027290	BART1_0-u19110	HvRDR3	AntherDataset	Yellow	coding	RNA-dependent RNA polymerase	35.1	not assigned.annotated	Probable RNA-dependent RNA polymerase 3 OS=Oryza sativa subsp. japonica (sp|q5qmn5|rdr3_orysj : 1052.0)	H	Probably involved in the RNA silencing pathway and required for the generation of small interfering RNAs (siRNAs)	2.68622	2.42663	1.9662	1.96252	1.34914	1.56841	1.13252	0.630235	0.764921	0.798222	0.630068	0.831299	1.55921	2.42679	2.10341	1.51315	0.889301	1.53858	0.492579	0.607299	0.562882	0.379062	0.244735	-0.347581	0.152906	-0.592438	0.863012	-0.193994	0.0393615	0.605357	0.155163	0.623443	0.0977589	-0.574353	NA
BAnTr.GP.3HG004610	mikado.chr3_part1G3424	HORVU.MOREX.r2.3HG0202900	HORVU3Hr1G027340	BART1_0-u19108	HvRDR4	AntherDataset	Blue	coding	RNA-dependent RNA polymerase	35.1	not assigned.annotated	Probable RNA-dependent RNA polymerase 3 OS=Oryza sativa subsp. japonica (sp|q5qmn5|rdr3_orysj : 1205.0)	H	Probably involved in the RNA silencing pathway and required for the generation of small interfering RNAs (siRNAs)	2.94847	2.63305	2.28563	1.23253	1.23489	1.51239	0.887986	0.359441	0.573062	0.362115	0.232817	0.775395	0.902547	0.822249	0.461126	0.808718	0.507897	0.647312	0.122439	0.027276	0.027739	0.008581	0.0363328	-0.743334	0.133511	-0.817789	0.611534	-0.702642	0.0765545	-0.682986	0.887557	0.106633	0.972342	-0.0281702	NA
BAnTr.GP.3HG006496	mikado.chr3_part1G4610	HORVU.MOREX.r2.3HG0213340	HORVU3Hr1G038830	BART1_0-u19958	HvAGO4a	BothDatasets	Green	coding	Argonaute	12.5.1.13	Chromatin organisation.DNA methylation.RNA-directed DNA methylation (RdDM) pathway.siRNA-integrating factor (AGO)	siRNA-integrating factor (AGO) (original description: none)	J	Belongs to the argonaute family	178.542	144.537	148.771	94.8447	89.03	97.6269	129.406	116.981	117.652	102.298	96.038	99.1138	163.506	116.839	105.759	162.784	167.979	172.853	38.5959	39.9393	38.3865	40.568	0.0132933	-0.527275	0.00863446	0.655269	0.472576	-0.281761	0.00241686	0.700596	0.0234562	0.531458	0.0583536	0.486131	HvAGO4a
BAnTr.GP.3HG011562	mikado.chr3_part2G2578	#N/A	HORVU3Hr1G075340	BART1_0-u22478	HvDRB4	BothDatasets	Olive	coding	DRBM domain-containing protein	35.1	not assigned.annotated	Double-stranded RNA-binding protein 1 OS=Oryza sativa subsp. japonica (sp|q5n8z0|drb1_orysj : 191.0)	J	Double-stranded RNA binding motif	83.302	95.9634	100.104	181.278	174.64	139.273	112.002	63.6963	69.9135	50.092	37.5908	50.1583	136.209	228.228	237.184	107.558	65.5674	115.829	13.5067	12.7611	13.7023	13.1593	0.00456991	1.03158	0.03648	-0.757569	0.181043	-0.798206	0.0944136	0.517261	0.469733	0.293064	0.0332189	-0.981766	NA
BAnTr.GP.3HG014282	mikado.chr3_part2G4676	HORVU.MOREX.r2.3HG0257650	HORVU3Hr1G092430	BART1_0-u23873	HvDCL3	BothDatasets	Olive	coding	Endoribonuclease Dicer homolog 3a	12.5.1.8	Chromatin organisation.DNA methylation.RNA-directed DNA methylation (RdDM) pathway.endoribonuclease (DCL3)	endoribonuclease (DCL3) (original description: none)	A	Belongs to the helicase family. Dicer subfamily	45.6977	49.2651	46.2167	48.7293	40.6065	47.7198	46.7409	28.3456	27.5644	28.2604	24.8053	34.9325	34.7183	37.8458	44.3233	35.7384	31.2565	35.6206	24.5656	27.4358	26.3608	25.1444	0.410165	0.164074	0.443594	-0.165746	0.648428	-0.191253	0.846501	0.0392494	0.71307	0.0983904	0.66189	-0.106605	NA
BAnTr.GP.3HG017160	#N/A	HORVU.MOREX.r2.3HG0267550	HORVU3Hr1G107690	BART1_0-u25126	HvRDR6	BothDatasets	Yellow	coding	RNA-dependent RNA polymerase	16.10.1.1	RNA processing.mRNA silencing.transacting siRNA pathway.ssRNA polymerase (RDR6)	ssRNA polymerase (RDR6) (original description: none)	H	Probably involved in the RNA silencing pathway and required for the generation of small interfering RNAs (siRNAs)	22.3261	19.8152	19.6599	17.5251	12.9113	11.9083	16.9204	6.53783	5.92763	5.69496	4.77463	6.38521	16.815	33.8471	38.473	11.35	9.72087	15.3719	7.2742	7.36602	7.34234	7.4303	0.389058	-0.357392	0.451913	-0.352326	0.452694	-0.674378	0.00466624	1.28353	0.3511	0.481602	0.0404076	-1.15425	NA
BAnTr.GP.4HG012740	mikado.chr4_part2G4704	HORVU.MOREX.r2.4HG0343780	HORVU4Hr1G084890	BART1_0-u31727	HvDCL1	BothDatasets	Olive	coding	Ribonuclease III domain	16.10.2.1.1	RNA processing.mRNA silencing.miRNA pathway.DCL1-HYL1 miRNA biogenesis complex.endoribonuclease component DCL1	endoribonuclease component DCL1 of DCL1-HYL1 miRNA biogenesis complex (original description: none)	A	Belongs to the helicase family. Dicer subfamily	9.03462	8.22282	8.66611	8.61018	7.19143	7.56483	6.97011	6.33376	5.02978	5.04566	4.95839	5.34238	6.9201	10.019	11.2294	6.68082	7.78211	7.20792	7.78637	7.88003	7.79987	8.05575	0.735753	0.0561258	0.698879	-0.0707737	0.460363	-0.236616	0.00301933	0.516897	0.0843558	0.313358	0.123813	-0.274313	NA
BAnTr.GP.5HG003324	mikado.chr5_part1G2332	HORVU.MOREX.r2.5HG0364120	HORVU5Hr1G019300	BART1_0-u33637	HvDCL2a	BothDatasets	Blue	coding	Endoribonuclease Dicer homolog 2	35.1	not assigned.annotated	Endoribonuclease Dicer homolog 2a OS=Oryza sativa subsp. japonica (sp|q10hl3|dcl2a_orysj : 1604.0)	A	Belongs to the helicase family. Dicer subfamily	10.3629	10.1576	8.95665	8.68608	7.79935	8.94525	6.44376	4.87861	4.51344	5.49441	3.96776	6.0379	5.17518	5.99193	5.67072	5.22768	4.01531	4.33292	15.0493	15.5457	16.857	15.7595	0.988706	0.00306017	0.0589642	-0.398027	0.924936	-0.0557836	0.0589885	-0.328062	0.487024	-0.168547	0.244886	-0.238513	NA
BAnTr.GP.5HG003326	mikado.chr5_part1G2334	HORVU.MOREX.r2.5HG0351260	HORVU5Hr1G019300	BART1_0-u33573	HvDCL2b	BothDatasets	Yellow	coding	Helicase ATP-binding domain-containing protein	35.1	not assigned.annotated	Endoribonuclease Dicer homolog 2b OS=Oryza sativa subsp. japonica (sp|q69lx2|dcl2b_orysj : 370.0)	A	Belongs to the helicase family. Dicer subfamily	1.88174	1.58054	1.2952	1.01622	0.76116	1.13902	0.836479	0.602241	0.525494	0.565505	0.43228	0.665333	0.970726	0.91747	0.970437	0.981017	0.645978	1.20892	3.99996	4.03778	3.73497	2.92685	0.105812	-0.501272	0.621864	-0.223914	0.794078	-0.293924	0.35934	0.280168	0.272042	0.507047	0.996611	0.00296535	NA
BAnTr.GP.5HG006818	mikado.chr5_part2G410	HORVU.MOREX.r2.5HG0384680	HORVU5Hr1G047070	BART1_0-u35409	HvDRB1a	BothDatasets	Navy	coding	Double-stranded RNA-binding protein 1	35.1	not assigned.annotated	Pentatricopeptide repeat-containing protein At2g38420, mitochondrial OS=Arabidopsis thaliana (sp|q8l6y7|pp193_arath : 94.0)	#N/A	#N/A	3.07775	2.70879	2.29284	1.93359	1.77526	1.77818	1.7669	0.870359	1.83291	1.85342	1.75944	2.13443	2.48165	2.85814	3.53875	2.61717	2.40562	2.47384	1.4529	0.781568	1.34554	1.74082	0.219717	-0.316253	0.999969	4.05e-05	0.643668	0.343522	0.0012293	0.946354	0.0278397	0.788407	0.528143	-0.157907	NA
BAnTr.GP.5HG006820	mikado.chr5_part2G412	HORVU.MOREX.r2.5HG0384690	HORVU5Hr1G047100	BART1_0-u35415	HvDRB1b	BothDatasets	Red	coding	Double-stranded RNA-binding protein 7	16.10.2.1.2	RNA processing.mRNA silencing.miRNA pathway.DCL1-HYL1 miRNA biogenesis complex.component HYL1	component HYL1 of DCL1-HYL1 miRNA biogenesis complex (original description: none)	J	Double-stranded RNA binding motif	54.343	51.9792	63.0836	53.1404	49.8653	59.6862	37.4127	35.1172	39.3572	35.4492	32.4673	39.7877	29.0393	32.857	30.8868	31.3321	29.5152	30.1208	75.0322	75.0472	78.0683	67.3271	0.268132	0.153848	0.10057	-0.253219	0.888632	-0.0517206	0.00130278	-0.539071	0.153811	-0.235283	0.786343	0.0505684	NA
BAnTr.GP.5HG007398	mikado.chr5_part2G792	HORVU.MOREX.r2.5HG0388230	HORVU0Hr1G012490	BART1_0-u58415	HvAGO6	BothDatasets	Navy	coding	Eukaryotic translation initiation factor 2C	12.5.1.13	Chromatin organisation.DNA methylation.RNA-directed DNA methylation (RdDM) pathway.siRNA-integrating factor (AGO)	siRNA-integrating factor (AGO) (original description: none)	J	Belongs to the argonaute family	42.898	44.108	43.8146	165.159	175.68	111.322	187.499	108.035	118.215	92.1008	117.516	76.082	381.83	406.163	340.425	406.836	307.842	331.279	2.01895	2.43834	2.02287	2.50853	4.5e-05	1.97353	0.678732	0.145046	0.383096	-0.50619	0.000127792	1.61254	0.000717814	1.42944	0.937202	-0.0380544	HvAGO6
BAnTr.GP.5HG011346	mikado.chr5_part2G3704	HORVU.MOREX.r2.5HG0410020	HORVU5Hr1G076910	BART1_0-u37586	HvDRB3	BothDatasets	Red	coding	Double-stranded RNA-binding	35.1	not assigned.annotated	Double-stranded RNA-binding protein 5 OS=Oryza sativa subsp. japonica (sp|b7e321|drb5_orysj : 251.0)	J	Double-stranded RNA binding motif	12.8667	20.2076	15.9002	9.57076	7.55509	13.7453	5.12462	3.94416	4.81342	3.19604	2.97508	8.28025	2.25724	3.29316	3.43702	2.1571	1.54665	0.955868	4.96959	4.66737	4.89974	4.23257	0.171979	-0.476409	0.0836521	-0.811628	0.889589	-0.177387	0.00194742	-1.48778	0.0110639	-1.58047	0.124289	-0.904323	NA
BAnTr.GP.5HG016740	mikado.chr5_part2G8148	HORVU.MOREX.r2.5HG0432750	HORVU5Hr1G107020	BART1_0-u40019	HvAGO5c	AntherDataset	Blue	coding	Eukaryotic translation initiation factor 2c, putative	35.1	not assigned.annotated	Protein argonaute MEL1 OS=Oryza sativa subsp. japonica (sp|q851r2|mel1_orysj : 1339.0)	J	Belongs to the argonaute family	239.453	176.326	173.844	22.5794	8.50375	46.705	2.19741	1.28238	0.561052	0.428797	0.447797	0.892335	10.2478	31.3051	52.4803	9.15396	1.81996	5.48022	0.203846	0.344448	0.337745	0.394738	0.00149932	-3.02404	0.0122335	-3.79682	0.793121	-1.19082	0.455446	0.585291	0.205069	1.93786	0.0408622	-2.44425	HvAGO5c
BAnTr.GP.5HG016752	mikado.chr5_part2G8170	HORVU.MOREX.r2.5HG0432840	HORVU5Hr1G107150	BART1_0-u40056	HvAGO5e	BothDatasets	Blue	coding	PAZ domain-containing protein	35.1	not assigned.annotated	Protein argonaute MEL1 OS=Oryza sativa subsp. japonica (sp|q851r2|mel1_orysj : 643.0)	J	Belongs to the argonaute family	43.956	30.6502	33.7717	12.1426	8.76993	15.0779	5.42518	4.42567	4.00377	4.44842	2.24609	4.77389	2.28741	4.33031	11.0471	2.71218	1.77844	3.14034	8.48167	12.3332	8.48128	9.6809	0.007227	-1.39924	0.0765752	-1.05454	0.798942	-0.36111	0.0437383	-1.00609	0.219243	-0.847318	0.156961	-0.895769	HvAGO5e
BAnTr.GP.6HG005696	#N/A	HORVU.MOREX.r2.6HG0478610	HORVU6Hr1G036840	BART1_0-u44230	HvAGO10a	AntherDataset	Blue	coding	Stabilizer of iron transporter SufD / Polynucleotidyl transferase isoform 1	16.10.3	RNA processing.mRNA silencing.RIS-Complex miRNA recruiting factor (AGO1)	RIS-Complex miRNA recruiting factor (AGO1) (original description: none)	J	Belongs to the argonaute family	0.911032	1.03178	0.74685	0.368579	0.312174	0.490305	0.388267	0.147839	0.108942	0.138644	0.19596	0.222983	0.198977	0.509175	0.515368	0.188442	0.139442	0.407005	0.059662	0.026956	0.014043	0	0.0463969	-0.984686	0.41764	-0.652836	0.970143	-0.105691	0.660018	0.229511	0.884893	0.16133	0.26122	-0.721018	HvAGO10a
BAnTr.GP.6HG009446	mikado.chr6_part2G1532	HORVU.MOREX.r2.6HG0500000	HORVU6Hr1G064910	BART1_0-u46045	HvAGO1a	BothDatasets	Grey	coding	Argonaute/Dicer protein	16.10.3	RNA processing.mRNA silencing.RIS-Complex miRNA recruiting factor (AGO1)	RIS-Complex miRNA recruiting factor (AGO1) (original description: none)	J	Belongs to the argonaute family	0.849129	0.851021	0.735507	0.646078	0.500029	0.669321	0.482035	0.280134	0.308108	0.456259	0.32469	0.454605	0.350161	0.280555	0.355897	0.415981	0.435679	0.357109	9.51762	11.778	11.2611	10.9554	0.272494	-0.228801	0.147375	-0.417786	0.823234	0.158221	0.0147435	-0.581553	0.54463	0.20469	0.161423	0.368457	HvAGO1a
BAnTr.GP.6HG010900	mikado.chr6_part2G2584	HORVU.MOREX.r2.6HG0508600	HORVU6Hr1G074180	BART1_0-u46552	HvRDR1a	BothDatasets	Red	coding	RNA-dependent RNA polymerase	35.1	not assigned.annotated	Probable RNA-dependent RNA polymerase 1 OS=Oryza sativa subsp. japonica (sp|q0dxs3|rdr1_orysj : 1259.0)	A	Probably involved in the RNA silencing pathway and required for the generation of small interfering RNAs (siRNAs)	5.74809	4.44365	3.85685	10.5519	8.4117	6.79843	8.90899	8.75982	8.59968	9.07142	9.64397	10.7026	2.71391	2.65895	2.39476	2.67929	2.55234	1.83873	1.55557	1.80876	2.2171	1.53749	0.000285657	1.08155	0.14161	0.344922	0.727872	0.167259	4.77e-05	-1.43057	3.35e-05	-1.84094	0.847994	-0.0654571	NA
BAnTr.GP.6HG010904	mikado.chr6_part2G2588	HORVU.MOREX.r2.6HG0508620	HORVU6Hr1G074220	BART1_0-u46563	HvRDR1b	BothDatasets	Navy	coding	RNA-dependent RNA polymerase	35.1	not assigned.annotated	RNA-dependent RNA polymerase 1 OS=Arabidopsis thaliana (sp|q9lqv2|rdr1_arath : 1251.0)	A	Probably involved in the RNA silencing pathway and required for the generation of small interfering RNAs (siRNAs)	6.1358	5.9381	5.86436	4.48378	4.88357	4.33232	7.81896	5.22397	4.8509	4.00148	4.93531	3.77022	10.6932	8.62168	7.64262	12.0121	16.707	9.31945	2.55723	1.64385	2.67712	1.95925	0.591423	-0.164397	0.052078	0.646418	0.447154	-0.469576	0.000574019	1.2191	0.00238831	1.12183	0.0863292	0.549144	NA
BAnTr.GP.7HG001238	mikado.chr7_part1G1000	#N/A	HORVU7Hr1G007000	BART1_0-u48821	HvAGO1e	BothDatasets	Green	coding	Argonaute	16.10.3	RNA processing.mRNA silencing.RIS-Complex miRNA recruiting factor (AGO1)	RIS-Complex miRNA recruiting factor (AGO1) (original description: none)	J	Belongs to the argonaute family	74.2045	62.7012	62.2692	33.9301	29.9996	31.992	44.9706	39.76	37.2106	36.6645	31.8659	32.719	44.7093	32.646	31.632	46.3463	67.6847	54.1218	16.9113	19.8546	19.2108	19.7546	0.000717353	-0.839282	0.00954817	0.629656	0.509865	-0.25768	0.0283543	0.43839	0.0257915	0.512593	0.0228437	0.703859	HvAGO1e
BAnTr.GP.7HG013480	mikado.chr7_part2G1774	HORVU.MOREX.r2.7HG0592530	HORVU7Hr1G084970	BART1_0-u54386	HvAGO10b	BothDatasets	Blue	coding	Stem cell self-renewal protein Piwi	35.1	not assigned.annotated	Protein argonaute PNH1 OS=Oryza sativa subsp. japonica (sp|q69vd5|pnh1_orysj : 746.0)	J	Belongs to the argonaute family	52.1014	59.1318	47.9128	22.8686	20.2484	28.3358	18.2202	11.2321	12.795	12.5884	11.6796	14.4417	10.145	19.3969	25.4429	10.5257	5.29913	5.62646	9.77734	10.2881	10.5327	9.32768	0.0117931	-0.948991	0.254841	-0.467898	0.912287	-0.122556	0.581016	-0.194562	0.0346026	-0.979951	0.0275728	-1.25329	HvAGO10b
BAnTr.GP.7HG019802	mikado.chr7_part2G6810	HORVU.MOREX.r2.7HG0622410	HORVU7Hr1G120600	BART1_0-u57184	HvAGO1d	BothDatasets	Blue	coding	Argonaute/Dicer protein	16.10.3	RNA processing.mRNA silencing.RIS-Complex miRNA recruiting factor (AGO1)	RIS-Complex miRNA recruiting factor (AGO1) (original description: none)	J	Belongs to the argonaute family	817.08	600.671	667.517	249.259	174.742	257.639	83.7027	36.2669	28.9902	35.5394	19.4231	31.2806	68.4109	110.022	184.753	52.4537	16.3387	50.1809	1.02274	0.982738	0.884234	0.848382	0.016136	-1.41295	0.00625792	-2.0354	0.5762	-0.677849	0.179796	-0.730586	0.713752	-0.293353	0.043692	-1.59817	HvAGO1d
BAnTr.GP.UnG004656	mikado.chrUnG3532	HORVU.MOREX.r2.6HG0526460	HORVU6Hr1G094860	BART1_0-u48208	HvAGO1c	BothDatasets	Green	coding	Eukaryotic translation initiation factor 2c	16.10.3	RNA processing.mRNA silencing.RIS-Complex miRNA recruiting factor (AGO1)	RIS-Complex miRNA recruiting factor (AGO1) (original description: none)	J	Belongs to the argonaute family	50.8676	21.1645	32.0776	9.93878	10.8994	12.4488	17.7973	50.2428	38.7851	42.9986	53.1594	39.3224	31.2997	17.0951	26.8029	30.5983	89.1802	106.479	10.1492	11.5853	10.9543	11.5316	0.0353399	-1.34018	0.0135628	1.82657	0.716973	0.480855	0.0269924	1.40117	0.113585	1.09556	0.0541277	1.52096	HvAGO1c
